# Supplementary material for: Cross-Reactivity to Mutated Viral Immune Targets Can Influence CD8+ T Cell Functionality: An Alternative Viral Adaptation Strategy
Source: Front Immunol. 2021 Oct 26;12:746986. doi: 10.3389/fimmu.2021.746986 (PMC8577586; doi:10.3389/fimmu.2021.746986)
Supplement: Supplementary Table 3 — Longitudinal sequencing of the autologous virus for subjects with multiple sampling timepoints and linked clinical data#. #Additional timepoints from the sorted sample were sequenced using Sanger sequencing; - data not available; &time in weeks for acute subjects and years for chronic subjects; *mixture; ^VL undetectable; $specific ART regime was not available for all subjects; ART, antiretroviral therapy; subject C3 only has one timepoint; timepoint used for analyses is in bold; subjects on treatment at the sampling timepoint commenced at this time. [file Table_3.xlsx]

## Sheet: Sheet 1
	Subject	Epitope	Time from sort (years)	Dominant form	Viral load (log copies/mL)	CD4+ T cell count (cells/mm3)	ART$
	A1	TY8	0	NAE	4.77012	507	No
			0.331507	NAE	5.15374	310	Yes
			0.5	-	2.72428	-	Yes
			0.769863	AE*	1.70^	560	Yes
	A2	TY8	0	AE	6.89265	253	Yes
			0.0767123	-	2.62531	440	Yes
			1.26575	-	1.70^	460	Yes
	A3	RF10	-0.0191781	NAE	7	437	No
			0	NAE	5.76641	-	Yes
			0.00821918	-	5.1038	-	Yes
			0.030137	-	3.96237	314	Yes
			0.0575342	-	3.22531	719	Yes
			0.136986	-	2.62325	856	Yes
			0.210959	-	2.44871	886	Yes
			0.460274	NAE	1.70^	986	Yes
	A4	RF10	0	AE	5.60724	477	No
			0.0493151	-	5.60724	477	No
			0.126027	-	4.91547	562	No
			0.279452	-	4.23699	499	No
			0.547945	-	4.48326	359	No
			0.816438	-	4.50226	338	No
			0.865753	AE	4.25234	351	Yes
	C1	TL10	-0.731507	NAE	4.02	756	No
			-0.0767123	NAE	5	468	No
			-0.00273973	-	5	405	No
			0.476712	-	1.84	1113	Yes
			0.569863	-	1.70^	1058	Yes
			0.978082	AE	2.98	558	Yes
			1.22466	-	1.70^	838	Yes
			1.47123	-	1.70^	747	Yes
			1.72329	-	1.70^	1024	Yes
			1.9726	-	1.70^	1037	Yes
	C2	TL10	-3.23836	AE	3.41	552	No
			-2.72055	AE	-	550	No
			-0.89863	AE	3.93	685	No
			-0.654795	AE	-	-	No
			-0.252055	-	3.9	539	No
			0	AE	-	-	No
	C3	TL10	0	AE	4.5	228	No
	C4	RF10	-2.64658	NAE	5.10877	228	Yes
			-2.16712	-	-	307	Yes
			-1.2274	-	-	259	Yes
			-0.635616	-	1.70^	353	Yes
			0	NAE	4.95383	224	Yes
			0.40274	-	3.60304	213	Yes
			0.649315	-	4.83877	80	Yes
			0.89863	NAE	5.71762	95	Yes
			1.7863	-	1.70^	235	Yes
	- data not available; * timepoint has a mixture; ^ VL is undetectable; $ specific ART regime was not available for all subjects; ART = antiretroviral therapy; additional timepoints from the sorted sample were sequenced using Sanger sequencing.
